# Supplementary material for: Highly effective ruthenium-doped mesoporous Ti1−xRuxO2−y crystals for photocatalytic tetracycline degradation
Source: Royal Society of Chemistry journal article supplement (doi:10.1039/d3tc01120h), 2023-01-01
Supplement: d3tc01120h1.pdf [file d3tc01120h1.pdf]

## Supporting information

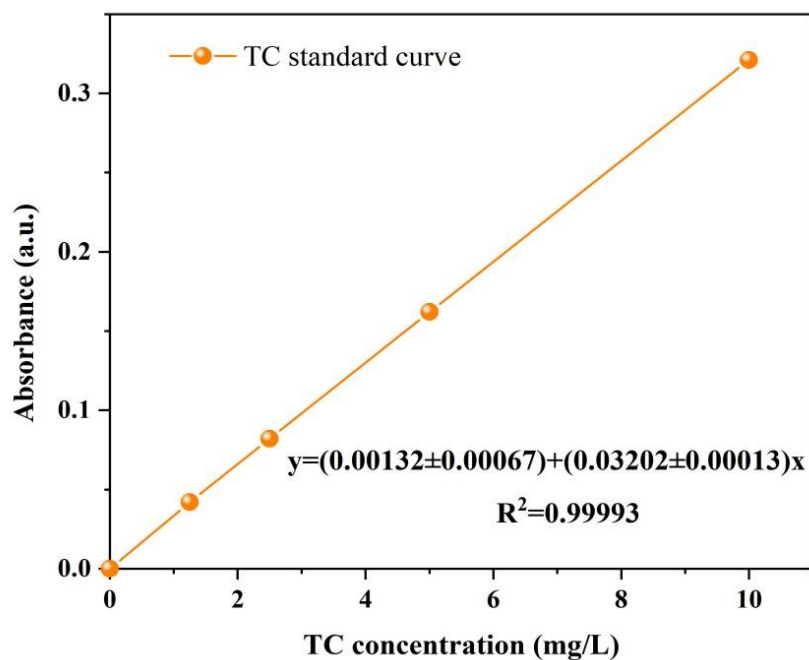

Figure S1. TC standard curve for absorbance and concentration.

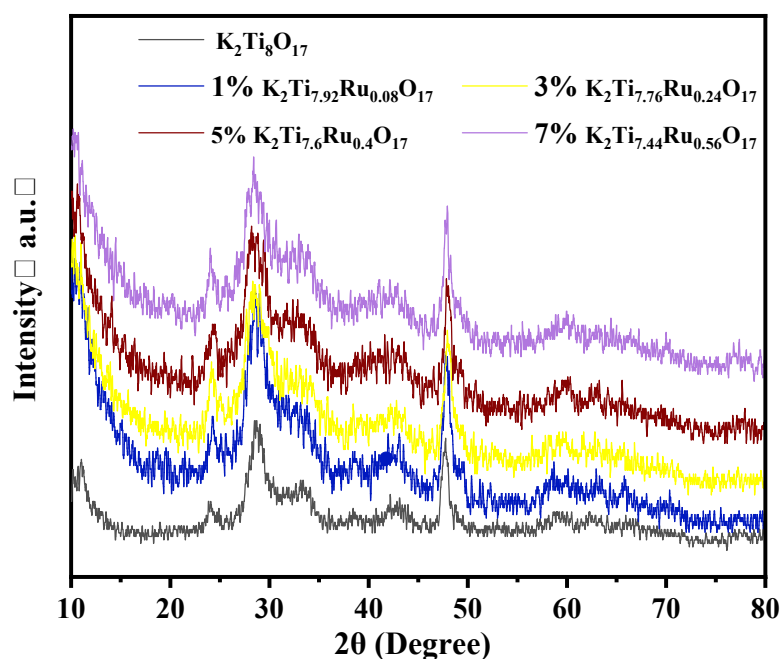

Figure S2. The powder XRD patterns of the  $K_2Ti_{8-x}Ru_xO_{17}$  precursors with different doping concentrations (Ru:(Ru+Ti)=0%, 1%, 3%, 5%, 7%).

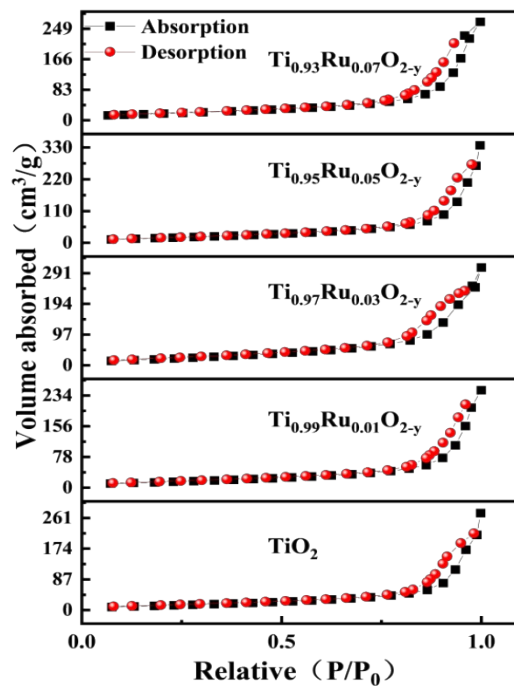

Figure S3.  $N_2$  adsorption-desorption isotherms of  $Ti_{1-x}Ru_xO_{2-y}$  with different molar ratios (Ru:(Ru+Ti)=0%, 1%, 3%, 5%, 7%).

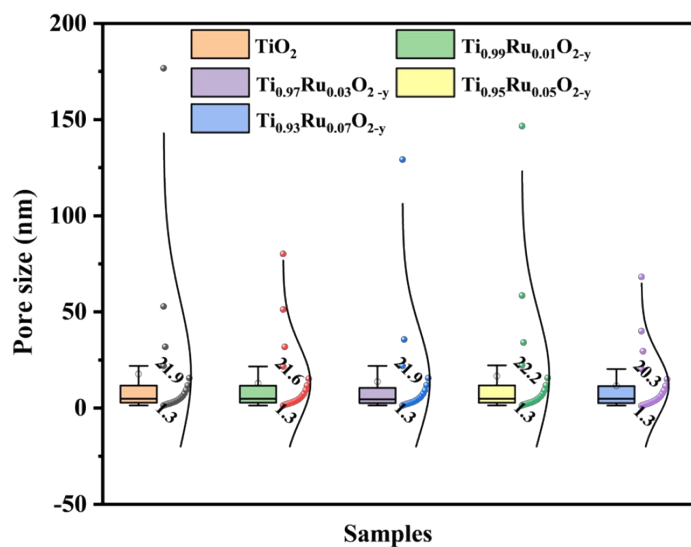

Figure S4. Pore size distribution of  $Ti_{1-x}Ru_xO_{2-y}$  with different molar ratios (Ru:(Ru+Ti)=0%, 1%, 3%, 5%, 7%).

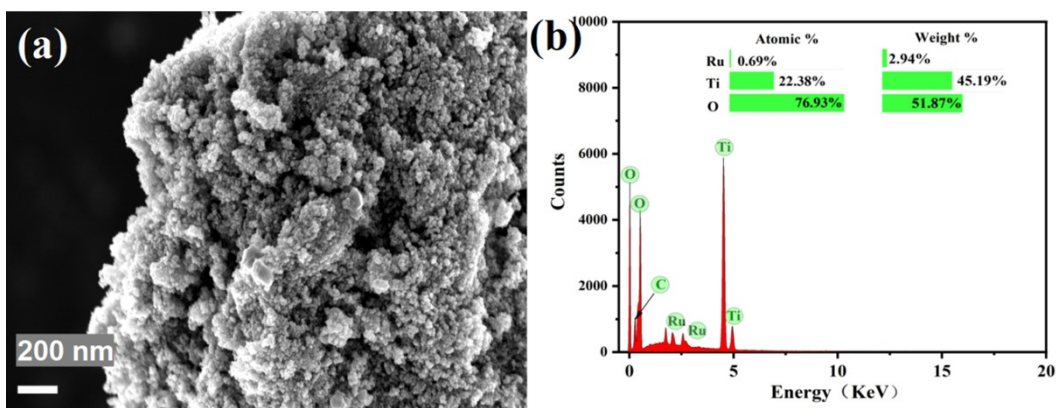

Figure S5. (a) SEM of  $\text{Ti}_{0.95}\text{Ru}_{0.05}\text{O}_{2-y}$ . (b) EDS of  $\text{Ti}_{0.95}\text{Ru}_{0.05}\text{O}_{2-y}$ .

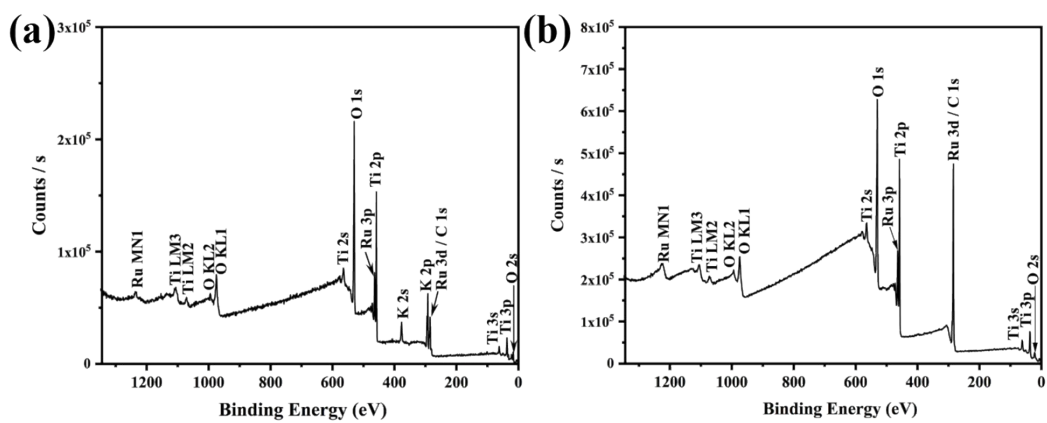

Figure S6. XPS survey spectra of (a)  $\text{K}_2\text{Ti}_{7.6}\text{Ru}_{0.4}\text{O}_{17}$  and (b)  $\text{Ti}_{0.95}\text{Ru}_{0.05}\text{O}_{2-y}$ .

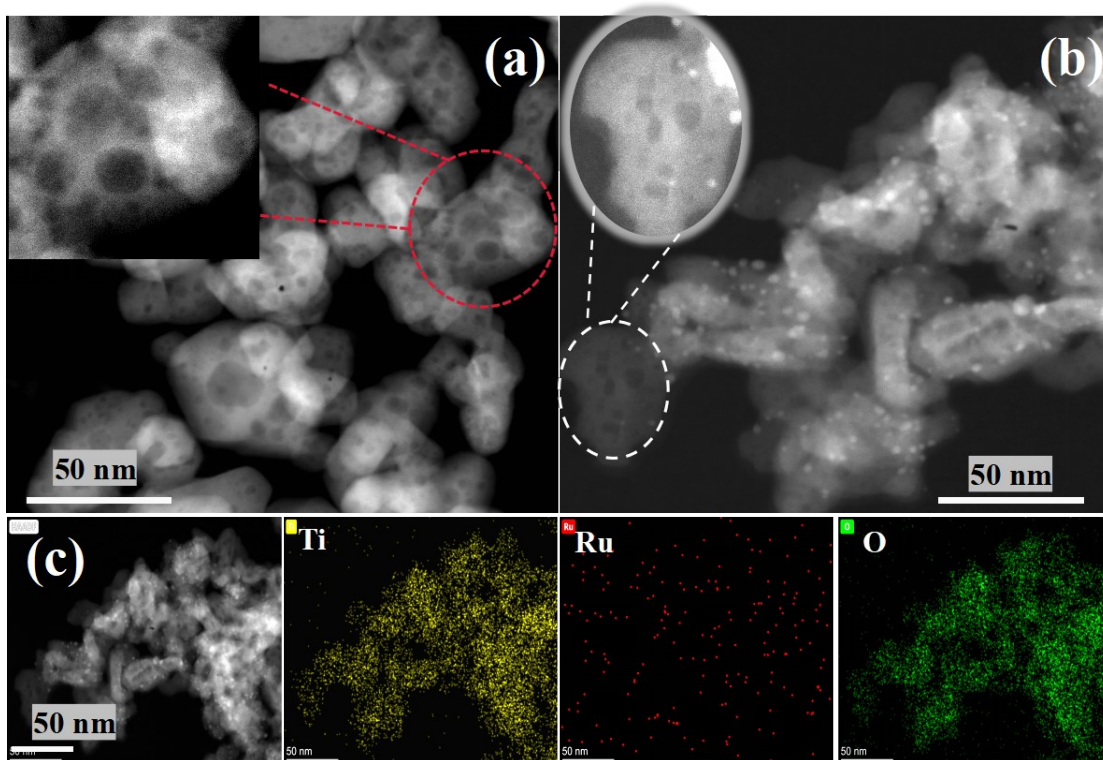

Figure S7. (a) High-angle annular dark-field scanning transmission electron microscopy (HAADF-STEM) of  $\text{TiO}_2$ . (b) HAADF-STEM of  $\text{Ti}_{0.95}\text{Ru}_{0.05}\text{O}_{2-y}$ . (c) Mapping of  $\text{Ti}_{0.95}\text{Ru}_{0.05}\text{O}_{2-y}$ .

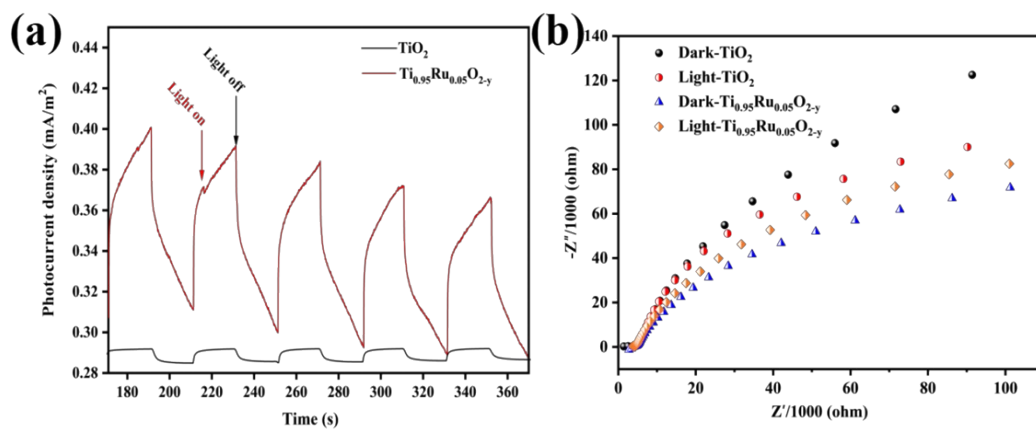

Figure S8. (a) Transient photocurrent response and (b) the EIS Nyquist plots of  $\text{TiO}_2$  and  $\text{Ti}_{0.95}\text{Ru}_{0.05}\text{O}_{2-y}$ .

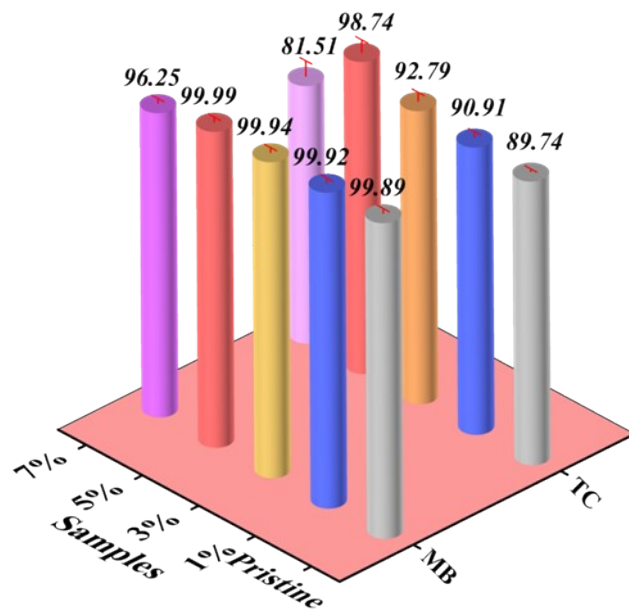

Figure S9 The photocatalytic degradation rate statistics of TC and MB by  $Ti_{1-x}Ru_xO_{2-y}$ .

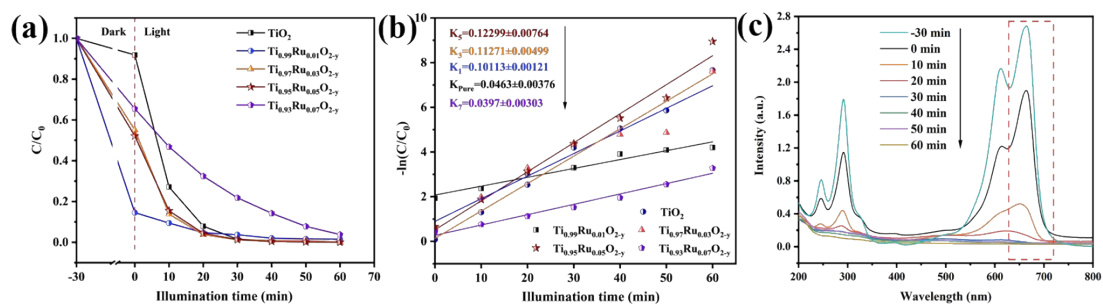

Figure S10. Photocatalytic degradation of MB of  $Ti_{1-x}Ru_xO_{2-y}$  under simulated sunlight: (a) degradation efficiency of MB (Initial conditions: 20 mg/L MB, 1 g/L catalysts.). (b) reaction kinetics of MB photodegradation curve. (c) UV-vis absorption spectrum of  $Ti_{0.95}Ru_{0.05}O_{2-y}$  photocatalytic degradation of MB.

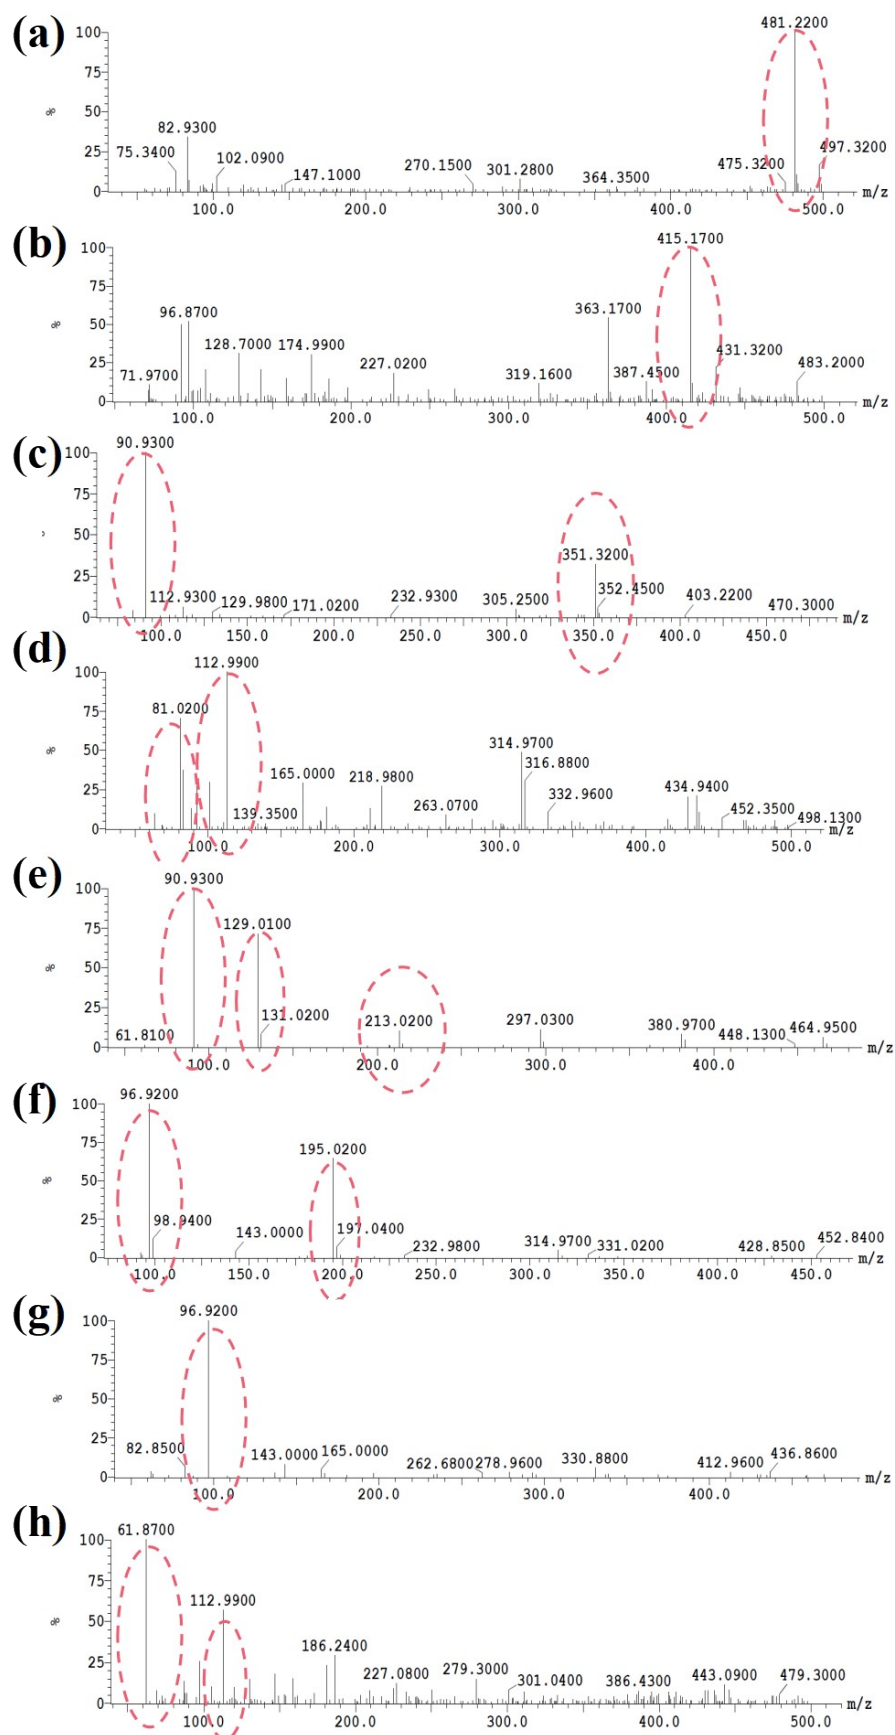

Figure S11 HPLC-MS of photocatalytic degradation TC by  $\text{Ti}_{0.95}\text{Ru}_{0.05}\text{O}_{2-y}$  in different reaction time periods. (a) 30 min, peak time: 7.38 min. (b) 40 min, peak time: 10.50 min. (c) 40 min, peak

time: 15.07 min. (d) 70 min, peak time: 2.52 min. (e) 50 min, peak time: 8.72 min. (f) 50 min, peak time: 1.67 min. (g) 70 min, peak time: 1.68 min. (h) 50 min, peak time: 7.82 min.

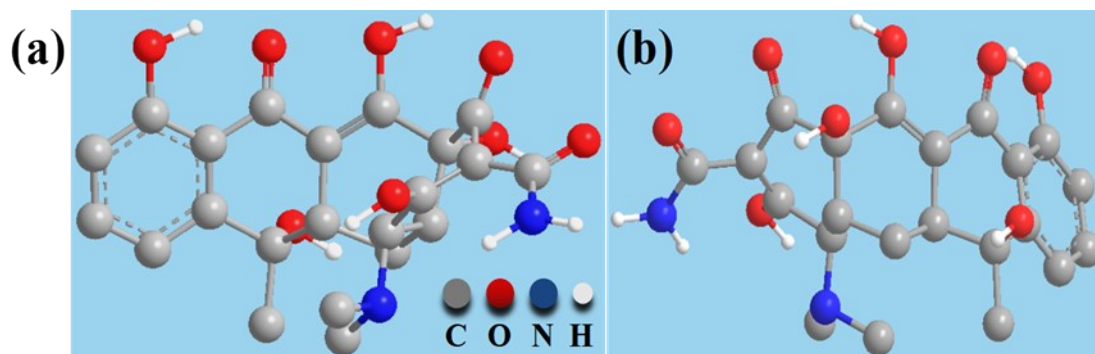

Table S1. Specific surface area of  $Ti_{1-x}Ru_xO_{2-y}$  with different molar ratios.

| $Ti_{1-x}Ru_xO_{2-y}$                | $TiO_2$ | $Ti_{0.99}Ru_{0.01}O_{2-y}$ | $Ti_{0.97}Ru_{0.03}O_{2-y}$ | $Ti_{0.95}Ru_{0.05}O_{2-y}$ | $Ti_{0.93}Ru_{0.07}O_{2-y}$ |
|--------------------------------------|---------|-----------------------------|-----------------------------|-----------------------------|-----------------------------|
| Specific surface area<br>( $m^2/g$ ) | 55.74   | 73.74                       | 69.34                       | 71.86                       | 79.63                       |

Table S2. Related parameters of ICP-AES

| Samples                     | Element | Weight/g | Volume/<br>ml | Dilution<br>factor | Instrument<br>indication<br>mg/L | Concentration/<br>mg/kg |
|-----------------------------|---------|----------|---------------|--------------------|----------------------------------|-------------------------|
| $K_2Ti_{7.6}Ru_{0.4}O_{17}$ | Ru      | 0.0408   | 50            | 50                 | 0.592                            | 36116.1208              |
| $K_2Ti_{7.6}Ru_{0.4}O_{17}$ | Ti      | 0.0408   | 50            | 50                 | 5.7969                           | 355203.6788             |
| $Ti_{0.95}Ru_{0.05}O_{2-y}$ | Ru      | 0.0563   | 50            | 10                 | 7.225                            | 64165.8035              |
| $Ti_{0.95}Ru_{0.05}O_{2-y}$ | Ti      | 0.0563   | 50            | 50                 | 14.1216                          | 627069.8474             |

Table S3. The degradation rates of TC, kinetic constants k value and correlation coefficient under different catalysts.

| Photocatalysts              | Light source       | Degradation<br>rate | k /min <sup>-1</sup> | References |
|-----------------------------|--------------------|---------------------|----------------------|------------|
| $Bi_2WO_6$                  | Visible            | 77.1%               | 0.021                | [24]       |
| $NaTaO_3@WO_3$              | Visible            | 60.9%               | None                 | [25]       |
| $Sb_2O_3$                   | UV                 | 80.6%               | None                 | [26]       |
| g- $C_3N_4/LaCoO_3$         | UV-Vis             | 92.0%               | 0.019                | [27]       |
| $Pb_4(BO_3)_2SO_4$          | UV-Vis             | 90.6%               | 0.216                | [28]       |
| l- $ZnFe_2O_4$              | Visible            | 84.1%               | 0.067                | [29]       |
| N- $TiO_2$                  | UV                 | 94.8%               | 0.038                | [30]       |
| $Ag@SnO_2/TiO_2$            | Simulated sunlight | 83.1%               | 0.057                | [31]       |
| $Ag-Bi_2MoO_6/TiO_2$        | Simulated sunlight | 90.8%               | 0.020                | [32]       |
| $TiO_2/GO$                  | Visible            | 53.6%               | None                 | [33]       |
| $Ti_{0.95}Ru_{0.05}O_{2-y}$ | Simulated sunlight | 98.7%               | 0.078                | This work  |
